# Supplementary material for: Plasma Amyloid-Beta Levels in a Pre-Symptomatic Dutch-Type Hereditary Cerebral Amyloid Angiopathy Pedigree: A Cross-Sectional and Longitudinal Investigation
Source: MDPI journal article supplement (doi:10.3390/ijms22062931), 2021-03-13
Supplement: s1 [file s1]

**Supplementary Figure 1. Comparison of plasma A $\beta$ 1-40 and A $\beta$ 1-42 levels A.) cross-sectionally between D-CAA mutation non-carriers and carriers at T1 and T2 utilising the xMAP INNO-BIA Plasma A $\beta$  Forms Multiplex Assay (Innogenetics, Ghent, Belgium) and B.) longitudinally between D-CAA mutation non-carriers and carriers.**

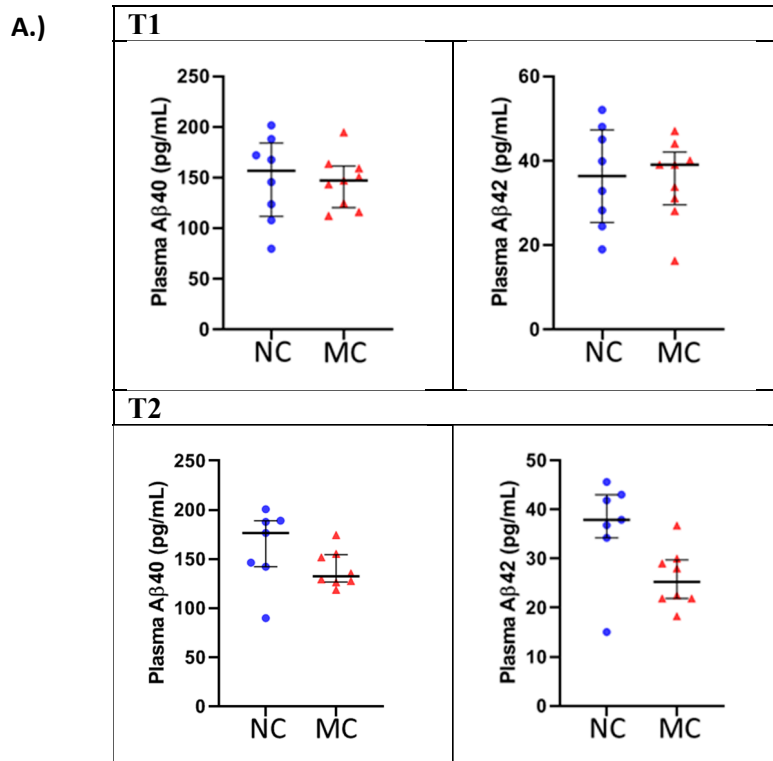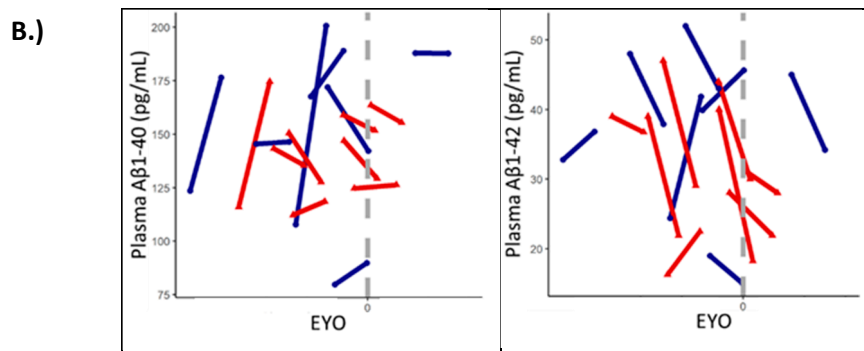

**Supplementary Table 1. Cross-sectional comparison of plasma A $\beta$  levels between pre-symptomatic D-CAA mutation carriers and non-carriers.** Plasma A $\beta$  levels were measured utilising the xMAP INNO-BIA Plasma A $\beta$  Forms Multiplex Assay (Innogenetics, Ghent, Belgium) and were compared between D-CAA mutation carriers and non-carriers using general linear models separately at T1 and T2. Data are presented as Mean $\pm$ SD in pg/mL. p<sup>a</sup> represents p-values adjusted for age, sex and *APOE*  $\epsilon$ 4 carrier status. p<.05 was considered significant and is presented in bold font.

|                | D-CAA NC           | D-CAA MC           | p           | p <sup>a</sup> |
|----------------|--------------------|--------------------|-------------|----------------|
| <b>T1</b>      | <b>n=8</b>         | <b>n=9</b>         |             |                |
| A $\beta$ 1-40 | 148.23 $\pm$ 41.93 | 145.66 $\pm$ 25.93 | .880        | .784           |
| A $\beta$ 1-42 | 36.16 $\pm$ 11.90  | 35.35 $\pm$ 9.33   | .877        | .780           |
| <b>T2</b>      | <b>n=7</b>         | <b>n=8</b>         |             |                |
| A $\beta$ 1-40 | 161.79 $\pm$ 38.59 | 139.89 $\pm$ 18.91 | .177        | .180           |
| A $\beta$ 1-42 | 36.35 $\pm$ 10.18  | 26.05 $\pm$ 5.98   | <b>.030</b> | .064           |

**Supplementary Table 2. Longitudinal comparison of plasma A $\beta$ 1-40 and A $\beta$ 1-42 measured by xMAP INNO-BIA Plasma A $\beta$  Forms Multiplex Assay (Innogenetics, Ghent, Belgium) between pre-symptomatic D-CAA mutation carriers and non-carriers.** Plasma A $\beta$ 1-40 and A $\beta$ 1-42 concentrations measured using the xMAP INNO-BIA Plasma A $\beta$  Forms Multiplex Assay platform were compared between D-CAA mutation carriers (MC) and non-carriers (NC) using repeated measures analyses at T1 and T2, before and after adjustment for covariates age, sex and *APOE*  $\epsilon$ 4 carrier status, using a factorial design (all two-way interactions with time included). Data are presented as Mean $\pm$ SD in pg/mL.  $p < .05$  was considered significant and is presented in bold font.

|                | D-CAA NC (n=7)     |                    | D-CAA MC (n=8)     |                    | Time |                 |             | Time (adjusted for covariates) |                 |             | Time*Mutation | Time*Mutation (adjusted for covariates) |
|----------------|--------------------|--------------------|--------------------|--------------------|------|-----------------|-------------|--------------------------------|-----------------|-------------|---------------|-----------------------------------------|
|                | T1                 | T2                 | T1                 | T2                 | $p$  | <i>Pairwise</i> |             | $p$                            | <i>Pairwise</i> |             | $p$           | $p$                                     |
|                |                    |                    |                    |                    |      | $p^{NC}$        | $p^{MC}$    |                                | $p^{NC}$        | $p^{MC}$    |               |                                         |
| A $\beta$ 1-40 | 140.61 $\pm$ 38.85 | 161.78 $\pm$ 38.59 | 139.52 $\pm$ 19.52 | 139.88 $\pm$ 18.91 | .231 | .114            | .976        | .225                           | .115            | .976        | .246          | .248                                    |
| A $\beta$ 1-42 | 37.30 $\pm$ 12.37  | 36.35 $\pm$ 10.18  | 35.55 $\pm$ 9.95   | 26.05 $\pm$ 5.98   | .066 | .807            | <b>.019</b> | .084                           | .687            | <b>.041</b> | .124          | .229                                    |
